# Supplementary material for: Schizophrenia-Associated hERG channel Kv11.1-3.1 Exhibits a Unique Trafficking Deficit that is Rescued Through Proteasome Inhibition for High Throughput Screening
Source: PubMed Central journal article supplement (PMC4754628; doi:10.1038/srep19976), 2016-02-16
Supplement: srep19976-s1.pdf [file srep19976-s1.pdf]

Supplementary Information:

Schizophrenia-Associated hERG channel Kv11.1-3.1 Exhibits a Unique Trafficking Deficit that is Rescued Through Proteasome Inhibition for High Throughput Screening

**Nicholas E. Calcaterra<sup>1</sup>, Daniel J. Hoepfner<sup>2</sup>, Huijun Wei<sup>2</sup>, Andrew E. Jaffe<sup>2,3</sup>, Brady J. Maher<sup>2,4,5\*</sup>, and James C. Barrow<sup>1,2\*</sup>**

From the Departments of <sup>1</sup>Pharmacology and Molecular Sciences, <sup>4</sup>Psychiatry and Behavioral Sciences, and <sup>5</sup>Neuroscience, Johns Hopkins University School of Medicine, Baltimore MD 21205

<sup>2</sup>Lieber Institute for Brain Development, Baltimore, MD 21205

<sup>3</sup>Johns Hopkins University Bloomberg School of Public Health, Baltimore, MD 21205

Supplementary Table:

Literature compounds screened for Kv11.1-3.1 trafficking rescue

| Compound                         | Description                                      | Trafficking Rescue? | Selected References |
|----------------------------------|--------------------------------------------------|---------------------|---------------------|
| <b>ALLN</b>                      | Calpain/Cathepsin/Proteasome inhibitor           | Yes                 | 22, 37              |
| <b>Carbamoylcholine Chloride</b> | Cholinergic agonist                              | No                  | 31                  |
| <b>Cisapride</b>                 | 5HT-4 agonist/Cholinergic agonist/hERG inhibitor | No                  | 29                  |
| <b>E4031</b>                     | hERG inhibitor                                   | No                  | 23, 29              |
| <b>Mg132</b>                     | Proteasome inhibitor                             | No                  | 36, 43              |
| <b>ML-T531</b>                   | hERG activator                                   | No                  | 35                  |
| <b>Nocodazole</b>                | Microtubule polymerization inhibitor             | No                  | 34                  |
| <b>PD-118057</b>                 | hERG activator                                   | No                  | 30                  |
| <b>VER-155008</b>                | Hsp70 inhibitor                                  | No                  | 33                  |
| <b>VU-0405601</b>                | hERG activator                                   | No                  | 32                  |
